# Supplementary material for: Hyperphosphatemia-Induced Oxidant/Antioxidant Imbalance Impairs Vascular Relaxation and Induces Inflammation and Fibrosis in Old Mice
Source: MDPI journal article supplement (doi:10.3390/antiox10081308), 2021-08-19
Supplement: s1 [file s1]

A

| General data of mice         | Young        | Old-24m      | Old-24m Low P |
|------------------------------|--------------|--------------|---------------|
| Body weight (g)              | 31.51 ± 0.72 | 36.03 ± 1.61 | 34.58 ± 1.52  |
| BMI (Kg/m <sup>2</sup> )     | 3.51 ± 0.07  | 3.47 ± 0.13  | 3.23 ± 0.08   |
| Water intake (mL/animal/day) | 4.08 ± 10.15 | 3.96 ± 0.14  | 3.86 ± 0.11   |
| Food intake (g/animal/day)   | 3.36 ± 0.15  | 3.62 ± 0.21  | 3.55 ± 0.20   |

B

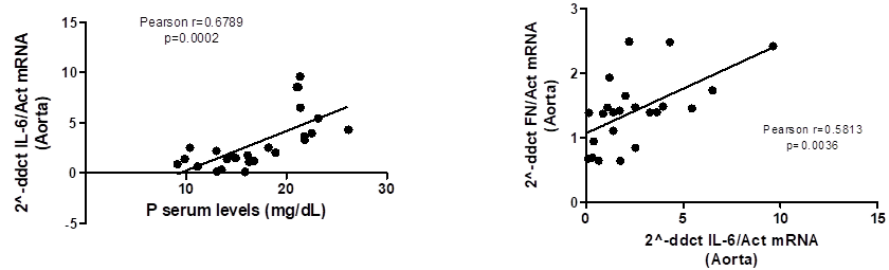

C

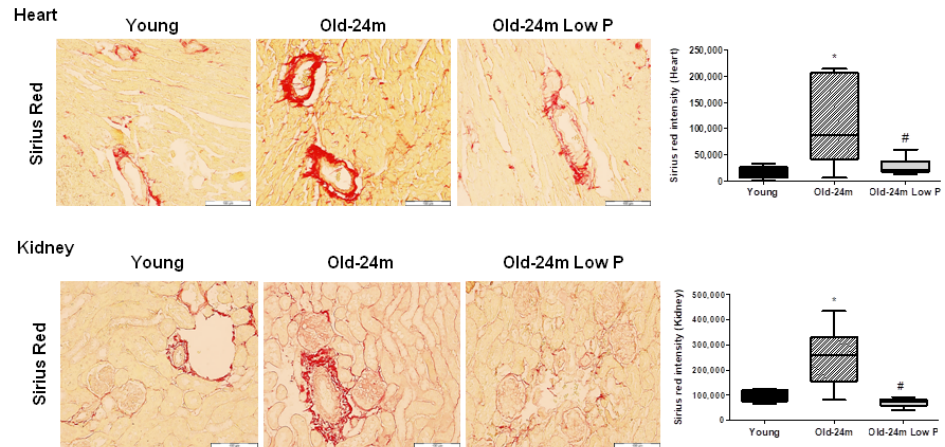

**Figure S1.** Additional data from in vivo studies in old mice. Male C57Bl6 mice from 5 month old (Young, closed bars), 24 month old fed with normal diet (Old-24 m, striped bars) and 24 month-old mice fed with a low phosphate diet for the last 3 months (Old-24 m Low P, grey bars) were used. (A) General data from all groups of mice studied (10 mice per group) are shown in a table including body weight and BMI, as well as water and food intake per day. (B) Graphs of correlations between the mRNA expression of pro-inflammatory cytokine IL-6 with P serum levels and with the fibrosis parameter FN are shown: IL-6 expression and P levels (Pearson  $r = 0.6789$ ,  $p = 0.0002$ ), IL-6 expression and FN expression (Pearson  $r = 0.5813$ ,  $p = 0.0036$ ). Values are from 8 mice per group. (C) Sirius red staining of the heart and kidney slices from mice (40x) is shown on the left of panel C with the graph of densitometric analysis on the right. Scale bar, 100  $\mu\text{m}$ . Values are the mean  $\pm$  SEM of 6 mice per group, \*  $p < 0.05$  vs. young, #  $p < 0.05$  vs. Old-24 m.

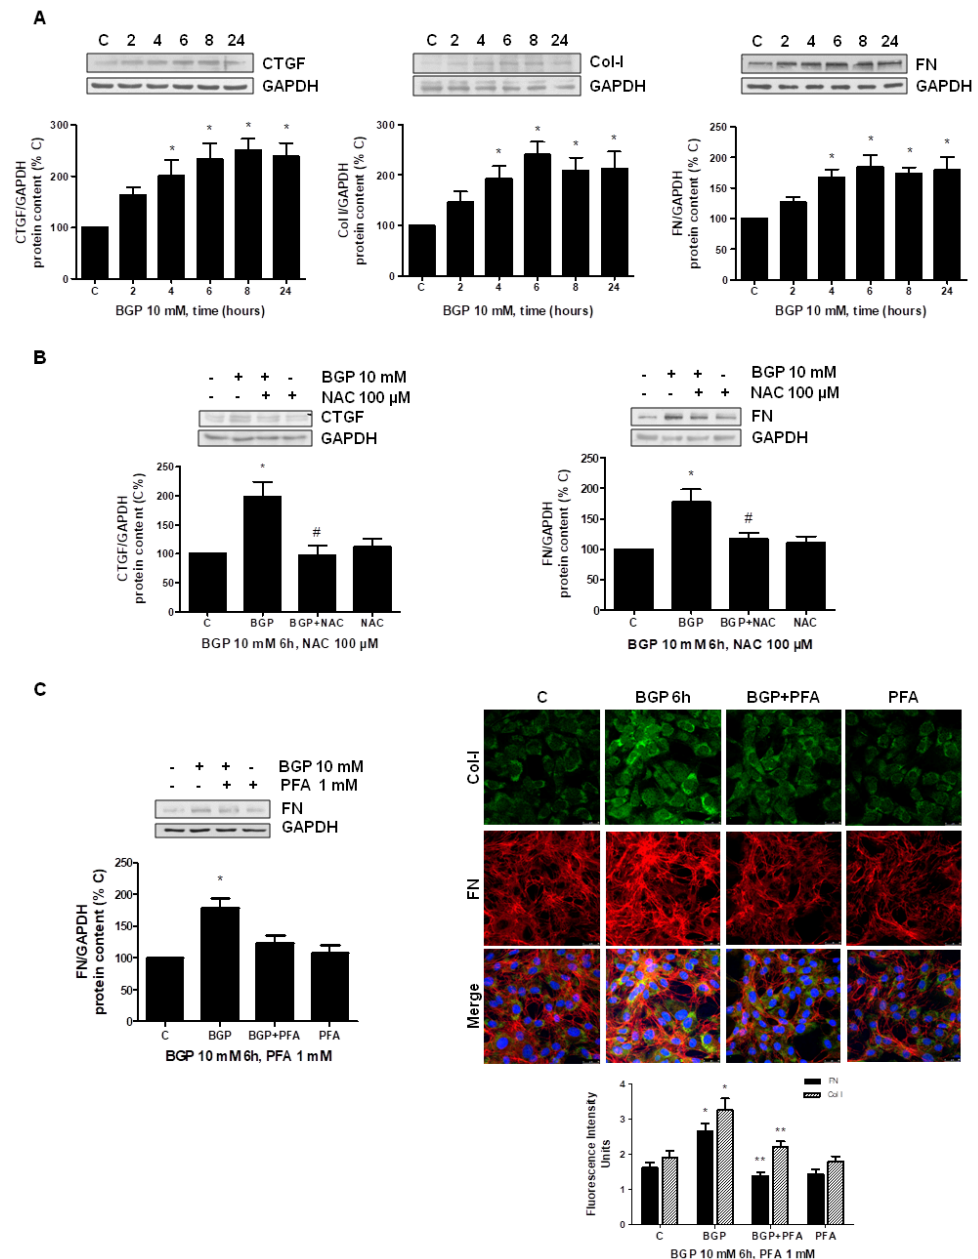

**Figure S2.** BGP-induced fibrosis in vascular smooth muscle cells. Smooth muscle cells (SMCs) were treated with 10 mM BGP at indicated times. (A) CTGF, Collagen I (Col I) and Fibronectin (FN) were assessed by Western blot. (B) SMCs were incubated with 10 mM BGP for 6 h in the presence or absence of 100  $\mu$ M NAC to assay CTGF and FN expression by Western blot. (C) To study the specific effect of BGP, cells were pre-incubated with 1 mM PFA, an antagonist of cotransporter Na-P termed Pit-1, and then FN protein content was assessed by Western blot (on the left panel C), and FN and Col I expression were analyzed by immunofluorescence (on the right panel C). Representative microphotographs of immunofluorescence are shown with 40  $\times$  magnification, scale bar, 50  $\mu$ m, with their densitometric analyses below pictures. A representative Western blot is included at the top of each panel with the densitometric analysis below. Values are the mean  $\pm$  SEM of 8 (A) or 4 (B,C) independent experiments, \*  $p$  < 0.05 vs. control cells (C) and #  $p$  < 0.05 vs. BGP alone.
